# Supplementary material for: Campylocarpon fasciculare (Nectriaceae, Sordariomycetes); Novel Emergence of Black-Foot Causing Pathogen on Young Grapevines in China
Source: MDPI journal article supplement (doi:10.3390/pathogens10121555), 2021-11-29
Supplement: s1 [file s1]

**Table S1.** Gene regions, respective primers, PCR protocols and references used in the study.

| Gene             | Primers      | PCR conditions:(Annealing temp. in bold)                     | References                                                  |
|------------------|--------------|--------------------------------------------------------------|-------------------------------------------------------------|
| ITS              | ITS5<br>ITS4 | (95 °C: 30 s, <b>59 °C</b> :50 s, 72 °C: 90 s) × 35 cycles   | White et al.(1990)                                          |
| <i>tefl-α</i>    | 728F<br>986R | (94 °C: 30 s, <b>54 °C</b> : 30 s, 72 °C: 30 s) × 35 cycles  | Carbone and Kohn (1999)                                     |
| <i>β-tubulin</i> | T1<br>Bt 2b  | (94 °C: 6 min, <b>56 °C</b> : 60 s, 72 °C: 45 s) × 35 cycles | O'Donnell and Cigelnik (1997)<br>Glass and Donaldson (1995) |

**Table S2.** Strains/isolates and their accession numbers used in phylogenetic analyses.

| Species                            | Isolate            | ITS             | <i>tefl-α</i>   | <i>β-tubulin</i> |
|------------------------------------|--------------------|-----------------|-----------------|------------------|
| <i>Campylocarpon fasciculare</i>   | CBS 112613         | AY677301        | JF735691        | AY677221         |
| <i>C.fasciculare</i>               | KARE1889           | MK400278        | MK409922        | MK409845         |
| <i>C.fasciculare</i>               | KARE1890           | MK400279        | MK409923        | MK409846         |
| <i>C.fasciculare</i>               | KARE1891           | MK400280        | MK409924        | MK409847         |
| <i>C.fasciculare</i>               | KARE1892           | MK400281        | MK409925        | MK409848         |
| <i>C.fasciculare</i>               | KARE1893           | MK400282        | MK409926        | MK409849         |
| <i>C.fasciculare</i>               | KARE1894           | MK400283        | MK409927        | MK409850         |
| <i>C.fasciculare</i>               | KARE1895           | MK400284        | MK409928        | MK409851         |
| <i>C.fasciculare</i>               | <b>JZB 3300001</b> | <b>OK605034</b> | <b>OK595364</b> | <b>OK595362</b>  |
| <i>C.fasciculare</i>               | <b>JZB 3300002</b> | <b>OK605035</b> | <b>OK595365</b> | <b>OK595363</b>  |
| <i>C.pseudofasciculare</i>         | CBS 112679         | AY677306        | JF735692        | AY677214         |
| <i>Dactylonectria alcacerensis</i> | CBS 129087         | JF735333        | JF735819        | AM419111         |
| <i>D.alcacerensis</i>              | Cy133              | JF735331        | JF735817        | JF735459         |
| <i>D.alcacerensis</i>              | KARE413            | MK400304        | MK409948        | MK409871         |
| <i>D.amazonica</i>                 | MUCL55430          | MF683706        | MF683664        | MF683643         |
| <i>D.amazonica</i>                 | MUCL55433          | MF683707        | MF683665        | MF683644         |
| <i>D.anthuriicola</i>              | CBS 129085         | JF735302        | JF735768        | JF735430         |
| <i>D.ecuadoriensis</i>             | MUCL55424          | MF683704        | MF683662        | MF683641         |
| <i>D.ecuadoriensis</i>             | KARE2108           | MK400316        | MK409960        | MK409883         |
| <i>D.estremocensis</i>             | CBS 129085         | JF735320        | JF735806        | JF735448         |
| <i>D.estremocensis</i>             | CPC 13539          | JF735330        | JF735816        | JF735458         |
| <i>D.hispanica</i>                 | CBS 142827         | KY676882        | KY676870        | KY676876         |
| <i>D.hispanica</i>                 | Cy228              | JF735301        | JF735767        | JF735429         |
| <i>D.macrodidyma</i>               | CBS 112615         | AY677284        | JF735833        | AY677229         |
| <i>D.macrodidyma</i>               | Cy123              | JF735341        | JF735837        | JF735470         |
| <i>D.macrodidyma</i>               | Cy139              | AM419071        | JF735839        | AM419106         |
| <i>D.macrodidyma</i>               | KARE423            | MK400300        | MK409944        | MK409867         |
| <i>D.novozelandica</i>             | CBS 113552         | JF735334        | JF735822        | AY677237         |

|                               |                     |          |          |          |
|-------------------------------|---------------------|----------|----------|----------|
| <i>D. novozelandica</i>       | Cy115               | JF735335 | JF735823 | JF735460 |
| <i>D. polyphaga</i>           | MUCL55209           | MF683689 | MF683647 | MF683626 |
| <i>D. polyphaga</i>           | MUCL54802           | MF683698 | MF683656 | MF683635 |
| <i>D. torresensis</i>         | CBS 129086          | JF735362 | JF735870 | JF735492 |
| <i>D. torresensis</i>         | Cy118               | JF735354 | JF735859 | JF735483 |
| <i>D. valentina</i>           | CBS 142826          | KY676881 | KY676869 | KY676875 |
| <i>D. valentina</i>           | KARE2111            | MK400314 | MK409958 | MK409881 |
| <i>D. vitis</i>               | CBS 129082          | JF735303 | JF735769 | JF735431 |
| <i>Ilyonectria capensis</i>   | CBS 132815          | JX231151 | JX231119 | JX231103 |
| <i>I. capensis</i>            | KARE1920            | MK400330 | MK409974 | MK409897 |
| <i>I. crassa</i>              | CBS 139.30          | JF735275 | JF735723 | JF735393 |
| <i>I. destuctans</i>          | CBS 264.65          | AY677273 | JF735695 | AY677256 |
| <i>I. europaea</i>            | CBS 129078          | JF735294 | JF735756 | JF735421 |
| <i>I. liriodendri</i>         | CBS 110.81          | DQ178163 | JF735696 | DQ178170 |
| <i>I. mors-panacis</i>        | CBS 306.35          | JF735288 | JF735746 | JF735414 |
| <i>I. palmarum</i>            | CBS 135754          | HF937431 | HF922614 | HF922608 |
| <i>I. robusta</i>             | CBS 308.35          | JF735264 | JF735707 | JF735377 |
| <i>I. venezuelensis</i>       | CBS 102032          | AM419059 | JF735760 | AY677255 |
| <i>Nectria balansae</i>       | CBS 125119          | HM484857 | HM484848 | HM484874 |
| <i>N. cinnabarina</i>         | A.R. 4477           | HM484548 | HM484527 | HM484606 |
| <i>Neonectria californica</i> | KARE1838/CBS145774  | MK400332 | MK409976 | MK409899 |
| <i>N. ditissima</i>           | CBS 226.31          | JF735309 | JF735783 | DQ789869 |
| <i>N. lugdunensis</i>         | CBS 125485          | KM231762 | KM231887 | KM232019 |
| <i>N. major</i>               | CBS 240.29          | JF735308 | JF735782 | DQ789872 |
| <i>N. neomacrospora</i>       | CBS 324.61          | JF735312 | HM364352 | DQ789875 |
| <i>N. obtusispora</i>         | CBS 183.36          | AM419061 | JF735796 | AM419085 |
| <i>N. ramulariae</i>          | CBS 151.29          | JF735313 | JF735791 | JF735438 |
| <i>Thelonectria acrotyla</i>  | G.J.S. 90-171       | JQ403329 | JQ394751 | JQ394720 |
| <i>T. amamiensis</i>          | MAFF 239819         | JQ403337 | KJ022348 | JQ394727 |
| <i>T. aurea</i>               | KARE1830/CBS 145584 | MK400285 | MK409929 | MK409852 |
| <i>T. blackeriella</i>        | BF142               | KX778711 | -        | KX778702 |
| <i>T. diademata</i>           | A.R. 4765           | NR137784 | JQ394736 | JQ394700 |
| <i>T. gongylodes</i>          | G.J.S. 04-171       | JQ403318 | JQ394744 | JQ394710 |
| <i>T. nodosa</i>              | G.J.S. 04-155       | JQ403317 | JQ394743 | JQ394709 |
| <i>T. olida</i>               | CBS 215.67          | KJ021982 | -        | KM232024 |
| <i>T. stemmata</i>            | C.T.R. 71-19        | JQ403312 | JQ394739 | JQ394704 |
| <i>T. torulosa</i>            | A.R. 4764           | JQ403309 | KJ022389 | JQ394701 |
| <i>T. trachosa</i>            | CBS 112467          | KF569842 | KF569860 | KF569869 |
| <i>T. truncata</i>            | G.J.S. 04-357       | JQ403319 | JQ394745 | KJ022324 |
| <i>T. truncata</i>            | MAFF241521          | JQ403339 | KJ022325 | JQ394757 |
| <i>T. veuillotiana</i>        | G.J.S. 92-24        | JQ403335 | JQ394755 | JQ394725 |
